# Supplementary material for: Novel ITS1 Fungal Primers for Characterization of the Mycobiome
Source: PubMed Central journal article supplement (PMC5729218; doi:10.1128/msphere.00488-17), 2017-12-13
Supplement: sph006172425st4.pdf [file sph006172425st4.pdf]

Table S2

| <b>Forward primers</b> | <b>Primer sequence (5' to 3')</b> | <b>Reverse primers</b> | <b>Primer sequence (5' to 3')</b> |
|------------------------|-----------------------------------|------------------------|-----------------------------------|
| ITS1-16F (N)           | CTYGCGTTGATTACGTCCCT              | ITS1-197R (N)          | ATGCCAGAACCAAGAGATCC              |
| ITS1-30F (N)           | GTCCCTGCCCTTTGTACACA              | ITS1-217R (N)          | TTTCGCTGCGTTCTTCATCG              |
| ITS1-12F (N)           | TCAGCTYGC GTTGATTACGT             | ITS1-219R (N)          | CATTTGCTGCGTTCTTCAT               |
| ITS1-54F (N)           | CCGTCGCTACTACCGATTGA              | ITS1-222R (N)          | TCGCATTTGCTGCGTTCTT               |
| ITS1-31F (N)           | TCCCTGCCCTTTGTACACAC              | ITS1-252R (N)          | TTC ACTGAATTCTGCAATTC             |
| ITS1-29F (N)           | CGTCCCTGCCCTTTGTACAC              | ITS1-281R (N)          | GGCGCAATGTGCGTTCAAAG              |
| ITS1-13F (N)           | CAGCTYGC GTTGATTACGTC             | ITS1-282R (N)          | GGGCGCAATGTGCGTTCAA               |
| ITS1-15F (N)           | GCTYGC GTTGATTACGTCCC             |                        |                                   |
| ITS1-14F (N)           | AGCTYGC GTTGATTACGTCC             |                        |                                   |
| ITS1-28F (N)           | ACGTCCCTGCCCTTTGTACA              |                        |                                   |
| ITS1-53F (N)           | CCCGTCGCTACTACCGATTG              |                        |                                   |
| ITS1-39F (N)           | CTTTGTACACACCGCCCGTC              |                        |                                   |
| ITS1-51F (N)           | CGCCCGTCGCTACTACCGAT              |                        |                                   |
| ITS1-52F (N)           | GCCCGTCGCTACTACCGATT              |                        |                                   |
| ITS1-32F (N)           | CCCTGCCCTTTGTACACACC              |                        |                                   |
| ITS1-33F (N)           | CCTGCCCTTTGTACACACCG              |                        |                                   |
| ITS1-27F (N)           | TACGTCCCTGCCCTTTGTAC              |                        |                                   |
| ITS1-26F (N)           | TTACGTCCCTGCCCTTTGTA              |                        |                                   |
| ITS1-25F (N)           | ATTACGTCCCTGCCCTTTGT              |                        |                                   |
| ITS1-23F (N)           | TGATTACGTCCCTGCCCTTT              |                        |                                   |

ITS1-50F (N) CCGCCCGTCGCTACTACCGA  
ITS1-49F (N) ACCGCCCGTCGCTACTACCG  
ITS1-17F (N) TYGCGTTGATTACGTCCCTG  
ITS1-11F (N) ATCAGCTYGCGTTGATTACG  
ITS1-43F (N) GTACACACCGCCCGTCGCTA  
ITS1-40F (N) TTTGTACACACCGCCCGTCG  
ITS1-35F (N) TGCCCTTTGTACACACCGCC  
ITS1-57F (N) TCGCTACTACCGATTGAATG  
ITS1-34F (N) CTGCCCTTTGTACACACCGC  
ITS1-58F (N) CGCTACTACCGATTGAATGG  
ITS1-56F (N) GTCGCTACTACCGATTGAAT  
ITS1-55F (N) CGTCGCTACTACCGATTGAA  
ITS1-10F (N) CATCAGCTYGCGTTGATTAC  
ITS1-24F (N) GATTACGTCCCTGCCCTTTG  
ITS1-22F (N) TTGATTACGTCCCTGCCCTT  
ITS1-42F (N) TGTACACACCGCCCGTCGCT  
ITS1-18F (N) YGCGTTGATTACGTCCCTGC  
ITS1-37F (N) CCCTTTGTACACACCGCCCG  
ITS1-19F (N) GCGTTGATTACGTCCCTGCC  
ITS1-41F (N) TTGTACACACCGCCCGTCGC  
ITS1-36F (N) GCCCTTTGTACACACCGCCC  
ITS1-38F (N) CCTTTGTACACACCGCCCGT  
ITS1-137F (N) GYTGKTCAAACCTYGGTCATT

ITS1-9F (N) TCATCAGCTYGCGTTGATTA  
ITS1-67F (N) CGATTGAATGGCTYAGTGAG  
ITS1-20F (N) CGTTGATTACGTCCCTGCCC  
ITS1-139F (N) TGKTCAAACCTGGTCATTTA  
ITS1-136F (N) AGYTGGTCAAACCTGGTCAT  
ITS1-49F (N) CACACCGCCCGTCGCTACTA  
ITS1-50F (N) ACACCGCCCGTCGCTACTAC  
ITS1-21F (N) GTTGATTACGTCCCTGCCCT  
ITS1-66F (N) CCGATTGAATGGCTYAGTGA  
ITS1-60F (N) CTACTACCGATTGAATGGCT  
ITS1-143F (N) CAAACTTGGTCATTTAGAGG  
ITS1-140F (N) GGTCAAACTTGGTCATTTAG  
ITS1-141F (N) GTCAAACCTGGTCATTTAGA  
ITS1-135F (N) AAGYTGGTCAAACCTGGTCA  
ITS1-144F (N) AAACCTGGTCATTTAGAGGA  
ITS1-51F (N) CACCGCCCGTCGCTACTACC  
ITS1-59F (N) GCTACTACCGATTGAATGGC  
ITS1-142F (N) TCAAACCTGGTCATTTAGAG  
ITS1-138F (N) YTGDTCAAACCTYGGTCATTT  
ITS1-4F (N) GCRAATCATCAGCTYGCGTT  
ITS1-6F (N) RAGTCATCAGCTYGCGTTGA  
ITS1-5F (N) YRAGTCATCAGCTYGCGTTG  
ITS1-47F (N) TACACACCGCCCGTCGCTAC

ITS1-48F (N) ACACACCGCCCGTCGCTACT  
ITS1-129F (N) GCYGRRAAGYTGRTCAAAC  
ITS1-145F (N) AACTTGGTCATTTAGAGGAA  
ITS1-8F (N) GTCATCAGCTYGCGTTGATT  
ITS1-128F (N) DGCYGRRAAGYTGRTCAAAC  
ITS1-7F (N) AGTCATCAGCTYGCGTTGAT  
ITS1-157F (N) TAGAGGAAGTAAAAGTCGTA  
ITS1-154F (N) ATTTAGAGGAAGTAAAAGTC  
ITS1-158F (N) AGAGGAAGTAAAAGTCGTAA  
ITS1-160F (N) AGGAAGTAAAAGTCGTAACA  
ITS1-161F (N) GGAAGTAAAAGTCGTAACAA  
ITS1-130F (N) CBGARAAKYTGRTCAAACCTT
