# Supplementary material for: Novel ITS1 Fungal Primers for Characterization of the Mycobiome
Source: PubMed Central journal article supplement (PMC5729218; doi:10.1128/msphere.00488-17), 2017-12-13
Supplement: sph006172425st5.pdf [file sph006172425st5.pdf]

Table S3

| <b>Phyla</b>                 | <b>Number of sequences</b> | <b>Percent</b> |
|------------------------------|----------------------------|----------------|
| <i>Ascomycota</i>            | 11321                      | 48.95%         |
| <i>Basidiomycota</i>         | 10039                      | 43.41%         |
| <i>Cercozoa</i>              | 5                          | 0.02%          |
| <i>Chytridiomycota</i>       | 146                        | 0.63%          |
| <i>Ciliophora</i>            | 1                          | 0.00%          |
| <i>Glomeromycota</i>         | 768                        | 3.32%          |
| Incertae sedis               | 6                          | 0.03%          |
| <i>Neocallimastigomycota</i> | 1                          | 0.00%          |
| <i>Rozellomycota</i>         | 27                         | 0.12%          |
| <i>Zygomycota</i>            | 438                        | 1.89%          |
| Unidentified                 | 376                        | 1.63%          |
